# Supplementary material for: Role of Different Antithrombotic Regimens after Percutaneous Left Atrial Appendage Occlusion: A Large Single Center Experience
Source: MDPI journal article supplement (doi:10.3390/jcm10091959), 2021-05-02
Supplement: s1 [file jcm-1158220-supplementary.pdf › jcm-1158220-supplementary.pdf]

**Table S1.** Baseline characteristics of the general population and of the 40 patients not included in the final analysis due to exclusion criteria.

|                                                                | <b>OVERALL<br/>(n 260)</b> | <b>EXCLUDED<br/>(n 40)</b> |
|----------------------------------------------------------------|----------------------------|----------------------------|
| Age, Mean $\pm$ SD                                             | 72.7 $\pm$ 8.8             | 72.7 $\pm$ 11.3            |
| Male, n (%)                                                    | 175 (67%)                  | 16 (40%)                   |
| NIDDM, n (%)                                                   | 53 (20%)                   | 4 (10%)                    |
| IDDM, n (%)                                                    | 22<br>(8.5%)               | 1 (2.5%)                   |
| Hypertension, n (%)                                            | 202 (77.7%)                | 21 (52.5%)                 |
| Previous TIA, n (%)                                            | 24<br>(9.2%)               | 3 (7.5%)                   |
| Previous Stroke, n (%)                                         | 66 (25.4%)                 | 10 (25%)                   |
| Previous Major Bleeding,<br>n (%)                              | 147<br>(56.5%)             | 16 (40%)                   |
| Congestive Heart Failure, n (%)                                | 74 (28.5%)                 | 16 (40%)                   |
| Coronary artery disease patients, n (%)                        | 84<br>(32%)                | 12 (30%)                   |
| Ejection Fraction,<br>Mean $\pm$ SD                            | 52 $\pm$ 10                | 62.5 $\pm$ 13.6            |
| Creatinine Clearance (ml/min), Mean $\pm$ SD                   | 59 $\pm$ 27                | 58.1 $\pm$ 26.1            |
| Chronic Kidney Disease, n (%)                                  | 83 (31.9%)                 | 12 (30%)                   |
| Dialysis, n (%)                                                | 17 (6.5%)                  | 1 (2.5%)                   |
| Hepatic Failure, n (%)                                         | 13 (5%)                    | 0                          |
| Labile INR, n (%)                                              | 27 (10.4%)                 | 6 (15%)                    |
| CHA <sub>2</sub> DS <sub>2</sub> -VASc score,<br>Mean $\pm$ SD | 3.8 $\pm$ 1.7              | 4.1 $\pm$ 1.6              |
| HAS-BLED score,<br>Mean $\pm$ SD                               | 3.6 $\pm$ 1.4              | 3.4 $\pm$ 1.4              |
| Previous trans-catheter ablation, n (%)                        | 42 (16.2%)                 | 2 (5%)                     |
| Previous surgical ablation, n (%)                              | 1 (0.4%)                   | 1 (2.5%)                   |

NIDDM: non-insulin dependent diabetes mellitus; IDDM: insulin dependent diabetes mellitus; TIA: transient ischemic attack; INR: international normalized ratio.
